# Supplementary material for: Development and characterization of a novel poly(N-isopropylacrylamide)-based thermoresponsive photoink and its applications in DLP bioprinting
Source: Royal Society of Chemistry journal article supplement (doi:10.1039/d4tb00682h), 2024-01-01
Supplement: d4tb00682h2.pdf [file d4tb00682h2.pdf]

*Supporting Information for:*

**Development and Characterization of a Novel Poly(N-isopropylacrylamide)-based Thermoresponsive Photoink and its Applications in DLP Bioprinting**

Kalindu D. C. Perera, Sophia M. Boiani, Alexandra K. Vasta, Katherine J. Messenger, Sabrina Delva and Jyothi U. Menon\*

(\*Corresponding author: jmenon@uri.edu)

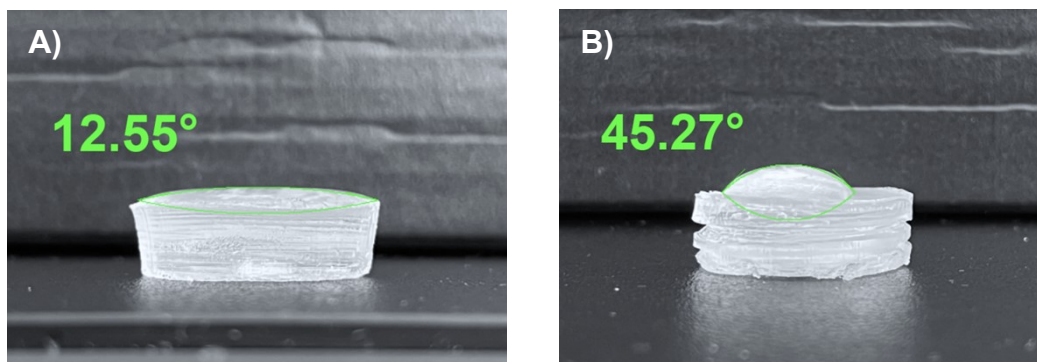

**Fig. S1** Contact angle measurements for hydrogels printed using our original formulation (unchanged concentrations of NIPAm and bisacrylamide from our previous work): **A)** 4°C and **B)** 37°C.

**Table S1** Formulation and results summary of full factorial experiment 1. All runs were performed in the order indicated by the statistical software, at n=2. (Bis= bisacrylamide, LAP= lithium phenyl-2,4,6-trimethylbenzoylphosphinate, LCST= lower critical solution temperature, Y/N= yes/no).

| Run# | [NIPAm]<br>(mg/mL) | [Bis]<br>(mg/mL) | [LAP]<br>(mg/mL) | [Tartrazine]<br>(mg/mL) | Bleaching | LCST (°C) |
|------|--------------------|------------------|------------------|-------------------------|-----------|-----------|
| 1    | 100                | 4                | 2                | 0.25                    | N         | 34.9      |
| 2    | 200                | 8                | 2                | 0.1                     | Y         | -         |
| 3    | 100                | 4                | 1                | 0.25                    | N         | 33.3      |
| 4    | 200                | 4                | 2                | 0.25                    | N         | 40.1      |
| 5    | 200                | 4                | 1                | 0.1                     | Y         | -         |
| 6    | 200                | 4                | 2                | 0.1                     | Y         | -         |
| 7    | 100                | 8                | 2                | 0.1                     | N         | 33.1      |
| 8    | 100                | 4                | 1                | 0.1                     | N         | 32.2      |
| 9    | 100                | 8                | 1                | 0.1                     | N         | 32.9      |
| 10   | 200                | 4                | 1                | 0.25                    | N         | 29.7      |
| 11   | 200                | 8                | 1                | 0.1                     | Y         | -         |
| 12   | 100                | 4                | 2                | 0.1                     | N         | 34.7      |
| 13   | 100                | 8                | 2                | 0.25                    | N         | 32.9      |
| 14   | 200                | 8                | 2                | 0.25                    | Y         | -         |
| 15   | 100                | 8                | 1                | 0.25                    | N         | 31.2      |
| 16   | 200                | 8                | 1                | 0.25                    | Y         | -         |

**Table S2** Parameter and results summary of full factorial experiment 2. All runs were performed in the order indicated by the statistical software, at n=2. Highlighted in grey are runs that were not completed (see Results & Discussion).

| Run# | Power (%) | Exposure time (s) | Base layer exposure factor (x) |
|------|-----------|-------------------|--------------------------------|
| 1    | 44        | 20                | 4                              |
| 2    | 36        | 20                | 4                              |
| 3    | 44        | 16                | 2                              |
| 4    | 36        | 20                | 4                              |
| 5    | 44        | 16                | 4                              |
| 6    | 44        | 16                | 4                              |
| 7    | 36        | 20                | 2                              |
| 8    | 36        | 16                | 2                              |
| 9    | 36        | 16                | 2                              |
| 10   | 36        | 16                | 4                              |
| 11   | 44        | 20                | 2                              |
| 12   | 44        | 16                | 2                              |
| 13   | 36        | 16                | 4                              |
| 14   | 44        | 20                | 2                              |
| 15   | 44        | 20                | 4                              |
| 16   | 36        | 20                | 2                              |

**Table S3** Formulation and results summary of full factorial experiment 3. All runs were performed in the order indicated by the statistical software, at n=2. (Bis= bisacrylamide, LAP= lithium phenyl-2,4,6-trimethylbenzoylphosphinate, LCST= lower critical solution temperature, Y/N= yes/no). Highlighted in grey is the formulation selected as final for all characterization.

| Run# | [NIPAm]<br>(mg/mL) | [Bis]<br>(mg/mL) | [LAP]<br>(mg/mL) | [Tartrazine]<br>(mg/mL) | Bleaching | LCST (°C) |
|------|--------------------|------------------|------------------|-------------------------|-----------|-----------|
| 1    | 100                | 16               | 2                | 0.5                     | Y         | -         |
| 2    | 150                | 16               | 2                | 0.5                     | Y         | -         |
| 3    | 100                | 8                | 3                | 0.5                     | N         | 32.1      |
| 4    | 100                | 16               | 3                | 0.5                     | Y         | -         |
| 5    | 100                | 8                | 2                | 0.25                    | N         | 34.7      |
| 6    | 150                | 16               | 3                | 0.25                    | Y         | -         |
| 7    | 150                | 8                | 2                | 0.5                     | N         | 36.8      |
| 8    | 150                | 16               | 2                | 0.25                    | Y         | -         |
| 9    | 100                | 8                | 2                | 0.5                     | Y         | -         |
| 10   | 150                | 16               | 3                | 0.5                     | Y         | -         |
| 11   | 100                | 8                | 3                | 0.25                    | N         | 30.7      |
| 12   | 150                | 8                | 3                | 0.5                     | Y         | -         |
| 13   | 150                | 8                | 2                | 0.25                    | N         | 33.8      |
| 14   | 100                | 16               | 3                | 0.25                    | Y         | -         |
| 15   | 100                | 16               | 2                | 0.25                    | Y         | -         |
| 16   | 150                | 8                | 4                | 0.25                    | N         | 40.3      |

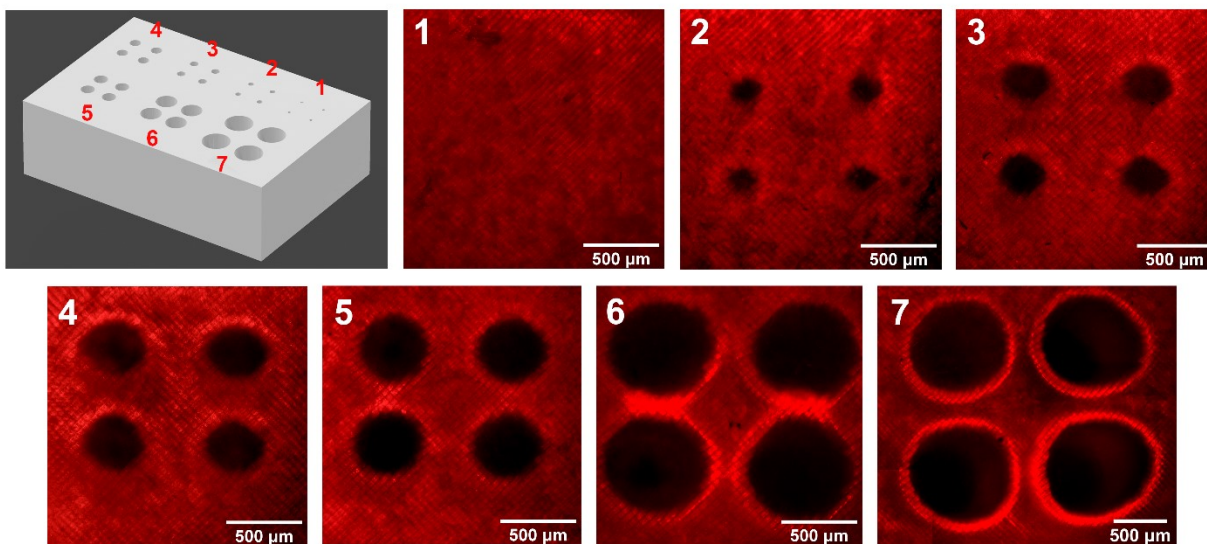

**Fig. S2** EVOS fluorescence micrographs of hydrogel with channels of increasing diameter (1= 100  $\mu\text{m}$ ; 2= 200  $\mu\text{m}$ ; 3= 300  $\mu\text{m}$ ; 4= 400  $\mu\text{m}$ ; 5= 500  $\mu\text{m}$ ; 6= 750  $\mu\text{m}$ , 7= 1000  $\mu\text{m}$ ). Gel loaded with rhodamine B for increased contrast. Print limit for circular features is 200  $\mu\text{m}$ : note absence of 100  $\mu\text{m}$  channels. All scale bars= 200  $\mu\text{m}$ . (Note: micrograph of 1000  $\mu\text{m}$  channels is a stitched composite, owing to size of wells and microscope's limited imaging field).

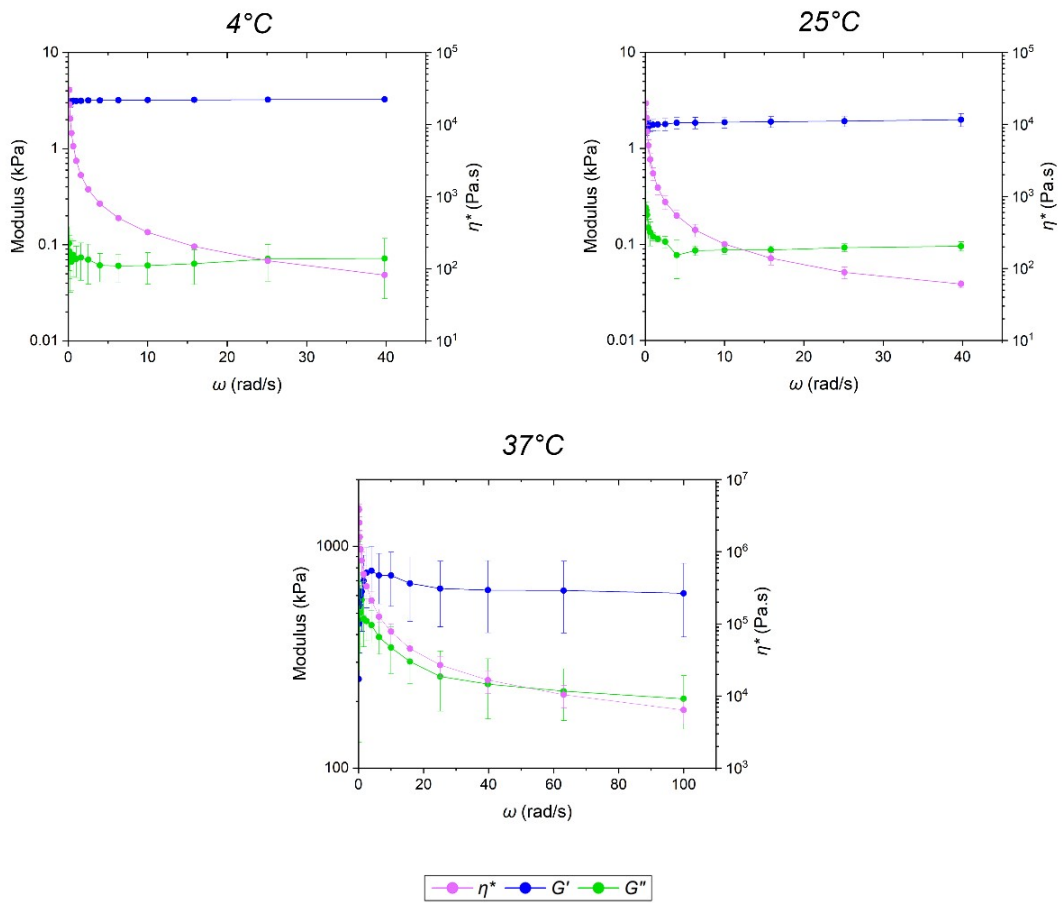

**Fig. S3** Mean trends of rheological parameters of PNIPAM discs at different temperatures.

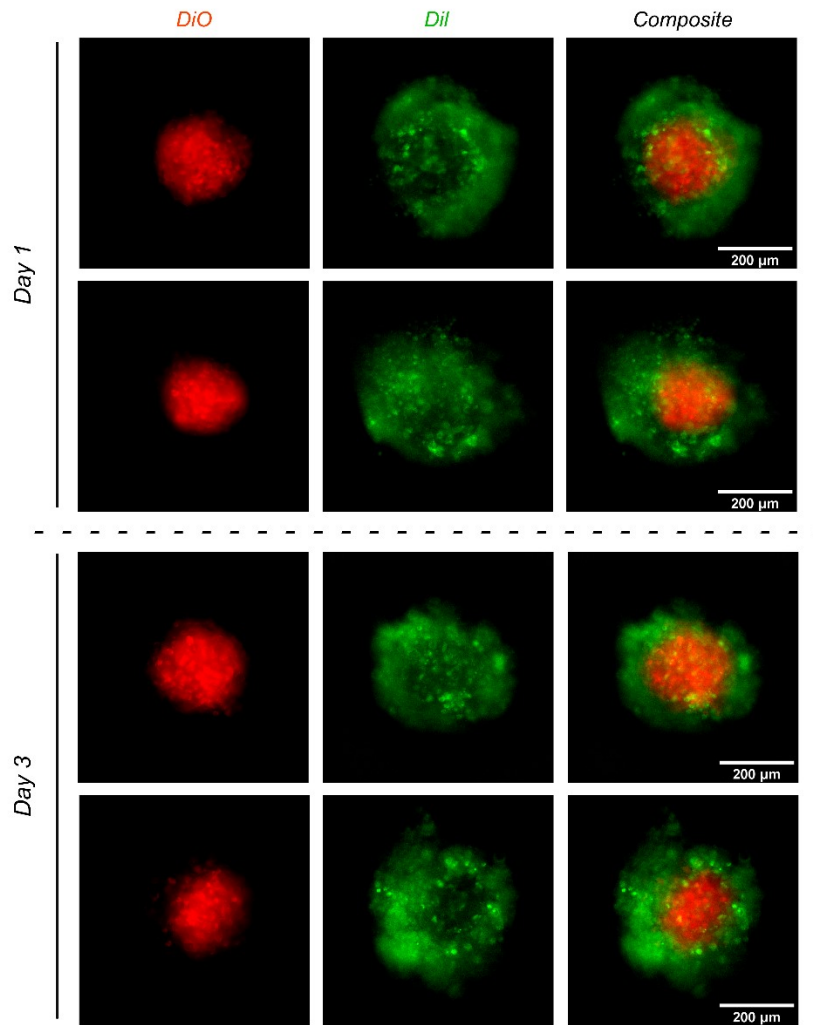

**Fig. S4** EVOS fluorescence micrographs of bilayer spheroids, days 1 and 3 (red/inner= HDFs, green/outer= HeLa). All scale bars= 200 μm.
